# Supplementary material
Source: ML conference proceedings conference paper supplement (https://openaccess.thecvf.com/content/ICCV_2019/html/Yamaguchi_Subspace_Structure-Aware_Spectral_ICCV_2019_paper.html)
Supplement: Supplementary file 1 [file Yamaguchi_Subspace_Structure-Aware_Spectral_ICCV_2019_supplemental.pdf]

# Subspace Structure-aware Spectral Clustering for Robust Subspace Clustering: Supplementary Material

## 1. Derivation of Eq. (10)

In this section, we consider the following problem:

$$\max_{\Sigma_1, \dots, \Sigma_K \in \mathcal{S}} \sum_i^N \log \sum_k^K G_{ik} \mathcal{N}(\mathbf{x}_i; 0, \Sigma_k), \quad (23)$$

where  $\mathcal{S} = \{\Sigma | \Sigma \in \mathcal{R}^{D \times D}, \Sigma = \Sigma^T \text{ and } \Sigma \succeq \sigma I\}$ . In the following, we will derive that the maximizers of Eq. (23)  $\hat{\Sigma}_1, \dots, \hat{\Sigma}_K$  can be analytically solved as follows:

$$\hat{\Sigma}_k = U_k \text{Diag}(\max(\mathbf{d}_k, \sigma \mathbf{1}_D)) U_k^T, \quad (24)$$

where  $\frac{1}{\sum_i G_{ik}} \sum_i G_{ik} \mathbf{x}_i \mathbf{x}_i^T = U_k \text{Diag}(\mathbf{d}_k) U_k^T$ . Since  $G_{ij} \in \{0, 1\}$  and  $G \mathbf{1}_K = \mathbf{1}_N$ , Eq. (23) can be represented as follows:

$$\begin{aligned} & \max_{\Sigma_1, \dots, \Sigma_K \in \mathcal{S}} \sum_i^N \log \sum_k^K G_{ik} \mathcal{N}(\mathbf{x}_i; 0, \Sigma_k) \\ &= \max_{\Sigma_1, \dots, \Sigma_K \in \mathcal{S}} \sum_i^N \sum_k^K G_{ik} \log \mathcal{N}(\mathbf{x}_i; 0, \Sigma_k) \\ &= \max_{\Sigma_1, \dots, \Sigma_K \in \mathcal{S}} \sum_k^K \sum_i^N G_{ik} \log \mathcal{N}(\mathbf{x}_i; 0, \Sigma_k) \\ &= \max_{\Sigma_1, \dots, \Sigma_K \in \mathcal{S}} \sum_k^K \sum_{i \in \mathcal{I}_k} \log \mathcal{N}(\mathbf{x}_i; 0, \Sigma_k) \\ &= \sum_k^K \max_{\Sigma_k \in \mathcal{S}} \sum_{i \in \mathcal{I}_k} \log \mathcal{N}(\mathbf{x}_i; 0, \Sigma_k), \end{aligned} \quad (25)$$

where  $\mathcal{I}_k = \{i | 1 \leq i \leq N, G_{ik} = 1\}$ . From Eq. (25), for deriving that Eq. (24) maximizes Eq. (23), it is sufficient to derive that the maximizer  $\hat{\Sigma}_*$  of the following problem can be analytically solved by  $\hat{\Sigma}_* = U_* \text{Diag}(\max(\mathbf{d}_*, \sigma \mathbf{1}_D)) U_*^T$ , where  $\frac{1}{m_*} \sum_{i \in \mathcal{I}_*} \mathbf{x}_i \mathbf{x}_i^T = U_* \text{Diag}(\mathbf{d}_*) U_*^T$  and  $m_* = \#\mathcal{I}_*$ :

$$\max_{\Sigma_* \in \mathcal{S}} \sum_{i \in \mathcal{I}_*} \log \mathcal{N}(\mathbf{x}_i; 0, \Sigma_*), \quad (26)$$

First, we consider the one-dimensional case (i.e., the case of  $D = 1$ ). In this case, Eq. (26) can be represented as follows:

$$\begin{aligned} & \max_{\Sigma_* \geq \sigma} \sum_{i \in \mathcal{I}_*} \log \mathcal{N}(\mathbf{x}_i; 0, \Sigma_*) \\ &= \max_{\Sigma_* \geq \sigma} -\frac{m}{2} \log(2\pi \Sigma_*) - \frac{m}{2\Sigma_*} d_*, \end{aligned} \quad (27)$$

where  $d_* = \frac{1}{m_*} \sum_i x_j^2$ . Also, note that  $\Sigma_*$  and  $\Sigma_*^\dagger$  are both scalar values since  $D = 1$ . Since  $\Sigma_* \geq \sigma$ , it can be easily shown that the maximizer of Eq. (27) is  $\hat{\Sigma}_* = \max(d_*, \sigma)$ .

Next, we consider Eq. (26). In this case, we can derive that the maximizer of Eq. (26) is  $\hat{\Sigma}_* = U_* \text{Diag}(\max(\mathbf{d}_*, \sigma \mathbf{1}_D)) U_*^T$  by first transforming data points with a matrix  $U_*^T$  so that each dimension of data points is decorrelated, then computing a covariance matrix  $\text{Diag}(\max(\mathbf{d}_k, \sigma \mathbf{1}_D))$  by solving Eq. (27) for each dimension, and finally re-transforming a computed matrix  $\text{Diag}(\max(\mathbf{d}_k, \sigma \mathbf{1}_D))$  with a matrix  $U_*$ .

## 2. Derivation of Eq. (11)

By applying singular value decomposition to  $\text{Diag}(\mathbf{g}_*)X$ , we have:

$$\text{Diag}(\mathbf{g}_*)X = V_* \Lambda_* U_*^T, \quad (28)$$

where  $\Lambda_*$  is a matrix such that  $\Lambda_* \in \mathcal{R}^{N \times D}$  and  $(\Lambda_*)_{ij} = (\boldsymbol{\lambda}_*)_i$  if  $i = j$ , otherwise 0, and  $V_*$  is a matrix such that  $V_* \in \mathcal{R}^{N \times N}$  and  $V_*^T V_* = I$ . Since a uncentered covariance matrix  $\frac{1}{m} X^T \text{Diag}(\mathbf{g}_*) \text{Diag}(\mathbf{g}_*) X = U_* \text{Diag}(\mathbf{d}_*) U_*^T$ , we have:

$$\begin{aligned} & U_* \text{Diag}(\mathbf{d}_*) U_*^T \\ &= \frac{1}{m_*} X^T \text{Diag}(\mathbf{g}_*) \text{Diag}(\mathbf{g}_*) X \\ &= \frac{1}{m_*} U_* \text{Diag}(\boldsymbol{\lambda}_k)^2 U_*^T, \end{aligned} \quad (29)$$

therefore

$$(\lambda_*^2)_d = m_* (\mathbf{d}_*)_d. \quad (30)$$

First, by substituting  $\hat{\Sigma}_* = U_* \text{Diag}(\max(\mathbf{d}_*, \sigma \mathbf{1}_D)) U_*^T$  into Eq. (26), we have:

$$\begin{aligned} & \sum_{i \in \mathcal{I}_*} \log \mathcal{N}(\mathbf{x}_i; 0, \Sigma_*) \\ &= - \sum_d^D \frac{m_*}{2} \log(2\pi \max(\sigma, (\mathbf{d}_*)_d)) + \frac{m_*}{2 \max(\sigma, (\mathbf{d}_*)_d)} (\mathbf{d}_*)_d \\ &= - m_* \sum_d^D \log \max(1, \sqrt{\frac{(\mathbf{d}_*)_d}{\sigma}}) + \frac{1}{2} \min(1, \frac{(\mathbf{d}_*)_d}{\sigma}) + \frac{1}{2} \log 2\pi \sigma \\ &= - m_* \sum_d^D \log \max(1, \sqrt{\frac{(\mathbf{d}_*)_d}{\sigma}}) + \frac{1}{2} \min(1, \frac{(\mathbf{d}_*)_d}{\sigma}) + \frac{1}{2} \log 2\pi \sigma \\ &= - m_* \sum_d^D \log \max(1, \frac{(\boldsymbol{\lambda}_*)_d}{\rho_*}) + \frac{1}{2} \min(1, \frac{(\boldsymbol{\lambda}_*)_d^2}{\rho_*^2}) + \frac{1}{2} \log 2\pi \sigma \\ &= - \sum_d^D f_{\rho_*}((\boldsymbol{\lambda}_*)_d) + \text{const.}, \end{aligned} \quad (31)$$

where  $\rho_* = \sqrt{m_* \sigma}$  and  $f_{\rho_*}(\lambda) = m_* \log \max(1, \frac{\lambda}{\rho_*}) + m_* \frac{1}{2} \min(1, \frac{\lambda^2}{\rho_*^2})$ .

From Eq. (25) and Eq. (31), we have:

$$\begin{aligned}
& r(G, X) \\
&= - \max_{\Sigma_1, \dots, \Sigma_K \in \mathcal{S}} \sum_i^N \log \sum_k^K G_{ik} \mathcal{N}(\mathbf{x}_i; 0, \Sigma_k) \\
&= - \sum_k^K \max_{\Sigma_k \in \mathcal{S}} \sum_{i \in \mathcal{I}_k} \log \mathcal{N}(\mathbf{x}_i; 0, \Sigma_k) \\
&= - \sum_k^K \sum_d^D f_{\rho_k}((\lambda_k)_d) + \text{const.}
\end{aligned} \tag{32}$$

### 3. Derivation of Eq. (17)

Because we can derive the maximizer of the problem  $\max_{\Sigma_1, \dots, \Sigma_K \in \mathcal{S}} \sum_i^N \sum_k^K q(Z_{ik} = 1) \log \mathcal{N}(\mathbf{x}_i; 0, \Sigma_k)$  by following steps written in section 1, we omit derivation of this.

### 4. Proof of Proposition 1

Since we assume  $\eta = 1$  and  $\Sigma_1, \dots, \Sigma_K$  are fixed, we can rewrite Eq. (13) as follows:

$$\max_{G \in \mathcal{H}} \sum_i^N \log \sum_k^K G_{ik} C_{ik}, \tag{33}$$

where  $C_{ik} = \mathcal{N}(\mathbf{x}_i; 0, \Sigma_k)$ , which is constant. For each  $i$ , if there is only a single value that equals to  $\max_k C_{ik}$  in  $C_{i1}, \dots, C_{iK}$ , the optimal solution  $\hat{G} \in \mathcal{H}$  satisfies  $\hat{G}_{ik} = \langle k = \arg \max_{k' \in \{1, \dots, K\}} \hat{G}_{ik'} \rangle = G_{ik}^\dagger$ , and even if it is not satisfied,  $k^\dagger = \arg \max_{k' \in \{1, \dots, K\}} \hat{G}_{ik'}$  satisfies  $C_{ik^\dagger} = \max_k C_{ik}$ , hence  $\sum_k^K \hat{G}_{ik} C_{ik} = \sum_k^K G_{ik}^\dagger C_{ik}$  holds. Therefore,  $G^\dagger$  obtained by Eq. (21) is also the optimal solution of Eq. (13).

### 5. The Optimal Solutions of Soft Spectral Clustering Problem

In this section, we prove that an assignment matrix  $G$  is always one of the optimal solutions of  $\epsilon(G, M) = \sum_{l=1}^K \frac{\mathbf{g}_l^T M \mathbf{g}_l}{\mathbf{g}_l^T D \mathbf{g}_l}$  if it can be factorized in the form of  $G = \mathbf{1}_N \mathbf{v}^T$ , where  $\mathbf{v}$  is a vector in the  $(K-1)$ -simplex and satisfies  $(\mathbf{v})_i > 0$  for all  $i$ . We also assume that an affinity matrix  $M$  satisfies  $M = M^T$  and  $M_{ij} \geq 0$ .

Since  $D_{ii} = \sum_j M_{ij}$  and  $D_{ij} = 0$  if  $i \neq j$ , we have:

$$\begin{aligned}
\mathbf{g}^T M \mathbf{g} - \mathbf{g}^T D \mathbf{g} &= \sum_{i,j} \mathbf{g}_i \mathbf{g}_j M_{ij} - \sum_{i,j} \mathbf{g}_i^2 M_{ij} \\
&= - \sum_{i,j} (\mathbf{g}_i - \mathbf{g}_j)^2 M_{ij} \leq 0
\end{aligned} \tag{34}$$

Specifically, Eq. (34) is maximized if  $(\mathbf{g})_i = (\mathbf{g})_j$  holds for all  $(i, j)$ .

By Eq. (34), we have:

$$\begin{aligned}
\epsilon(G, M) &= \sum_{l=1}^K \frac{\mathbf{g}_l^T M \mathbf{g}_l}{\mathbf{g}_l^T D \mathbf{g}_l} \\
&= K + \sum_{l=1}^K \frac{\mathbf{g}_l^T M \mathbf{g}_l - \mathbf{g}_l^T D \mathbf{g}_l}{\mathbf{g}_l^T D \mathbf{g}_l} \\
&= K - \sum_{l=1}^K \frac{\sum_{i,j} ((\mathbf{g}_l)_i - (\mathbf{g}_l)_j)^2 M_{ij}}{\mathbf{g}_l^T D \mathbf{g}_l} \\
&\leq K
\end{aligned} \tag{35}$$

Specifically,  $\epsilon(G, M)$  is maximized if  $(\mathbf{g}_l)_i = (\mathbf{g}_l)_j$  holds for all  $(i, j, l)$ . Therefore, when  $G = \mathbf{1}_N \mathbf{v}^T$  and  $\mathbf{v}$  is in the  $(K - 1)$ -simplex and satisfies  $(\mathbf{v})_i > 0$  for all  $i$ , it is one of the optimal solutions of  $\epsilon(G, M) = \sum_{l=1}^K \frac{\mathbf{g}_l^T M \mathbf{g}_l}{\mathbf{g}_l^T D \mathbf{g}_l}$ .
